# Supplementary material for: Outcomes and healthcare resource utilization in adult congenital heart disease patients with heart failure
Source: PubMed Central journal article supplement — ESC Heart Fail. 2021 Aug 17;8(5):4139–51. doi: 10.1002/ehf2.13529 (PMC8497229; doi:10.1002/ehf2.13529), 2021-08-17

Supplemental Figure 1

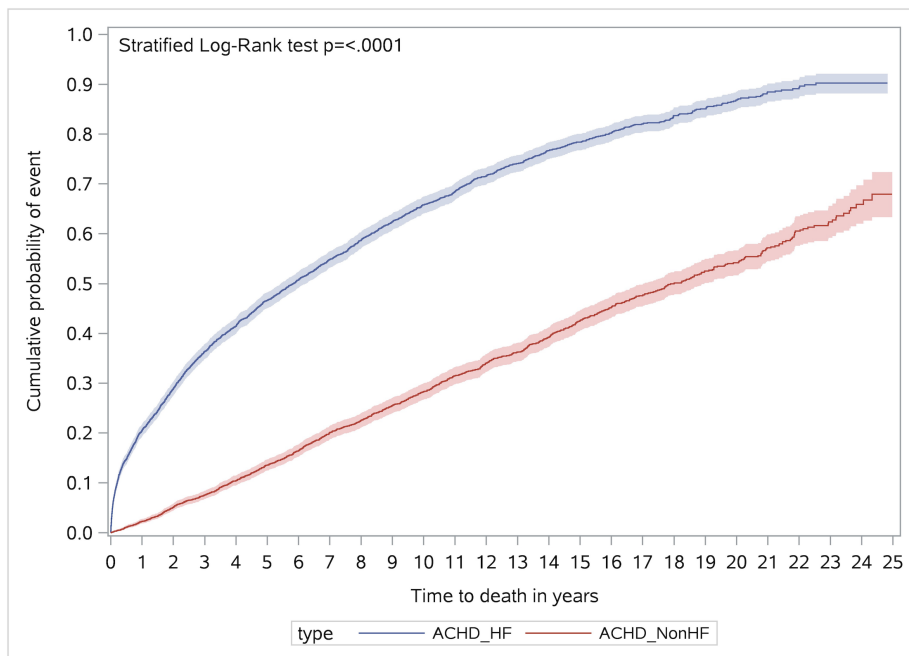

Supplemental Figure 2

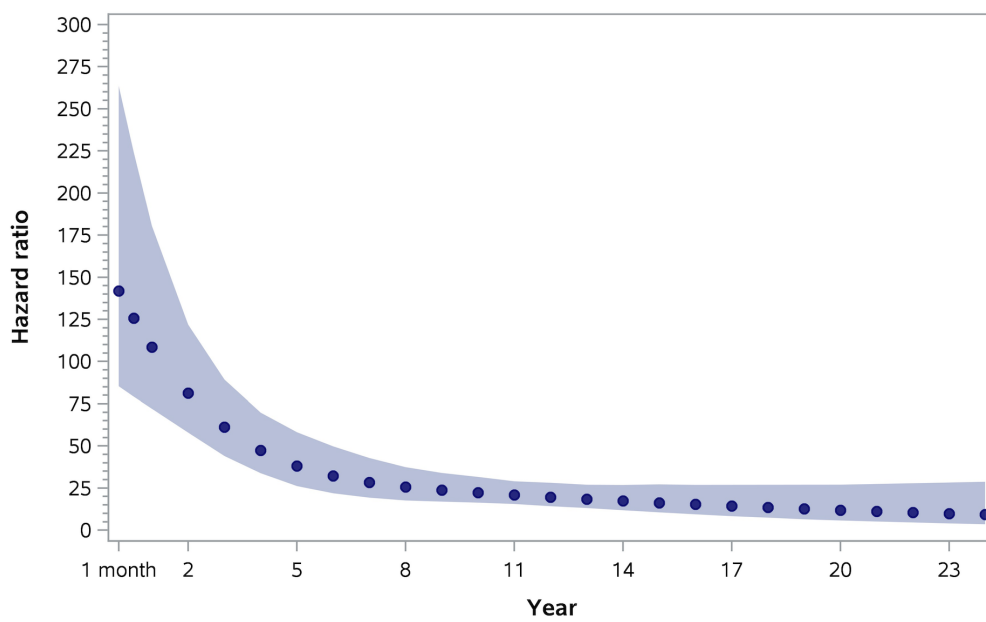

Supplemental Figure 3

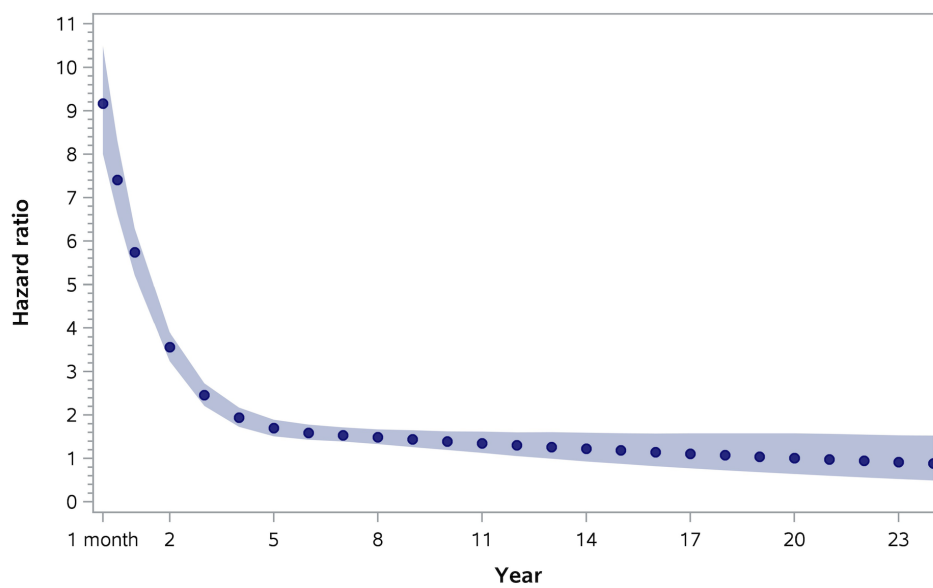

Supplemental Figure 4

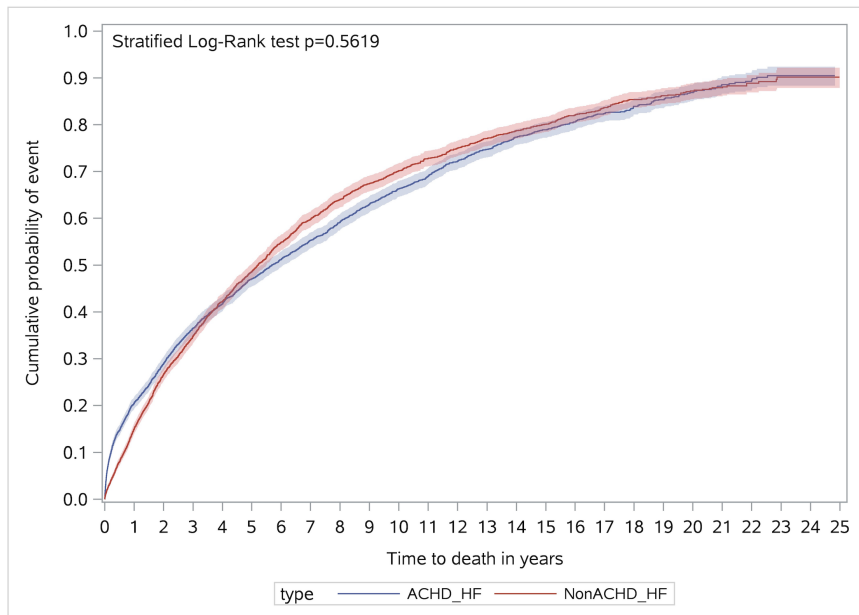

Supplemental Figure 5

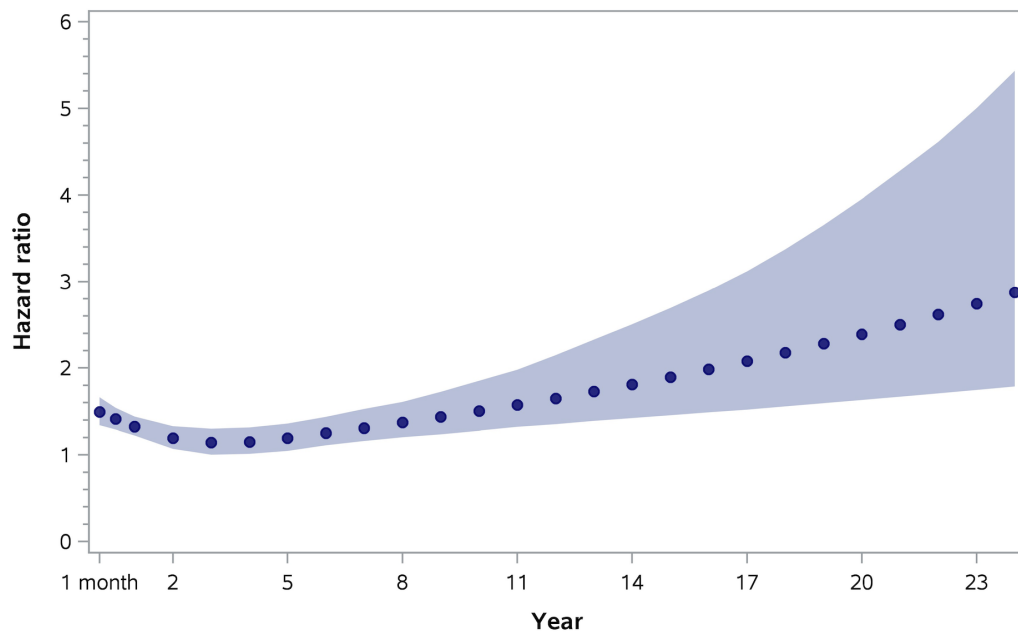

Supplemental Figure 6

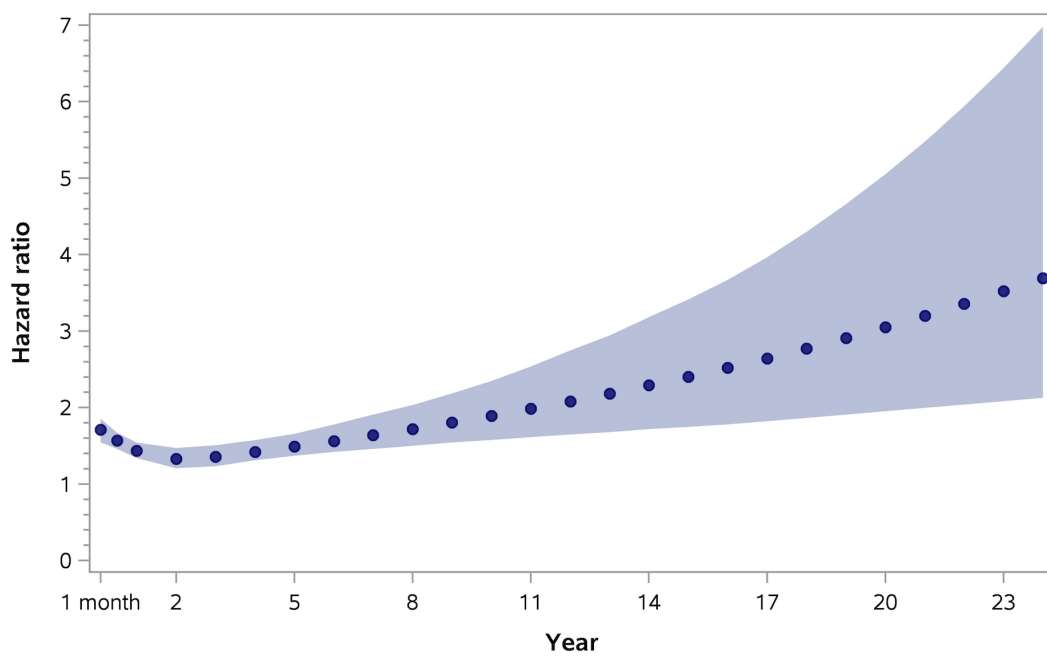

Supplement: EHF2-8-4139-s001.pdf [file EHF2-8-4139-s001.pdf]
